# Supplementary material for: Brief Mindfulness Intervention vs. Health Enhancement Program for Patients Undergoing Dialysis: A Randomized Controlled Trial
Source: MDPI journal article supplement (doi:10.3390/healthcare9060659), 2021-06-01
Supplement: s1 [file s1]

## Supplemental Material

### Table of Contents

1. Table S1: Treatment Group (BMI) Thematic Analysis
2. Table S2: Active Control Group (HEP) Thematic Analysis

**Table S1.** Treatment Group (BMI) Thematic Analysis.

| Overarching Themes       | Interpretative Themes                     | Descriptive Themes and Quotes                                                                                                                                                                                                         |
|--------------------------|-------------------------------------------|---------------------------------------------------------------------------------------------------------------------------------------------------------------------------------------------------------------------------------------|
| 1. Therapeutic Benefits  | Improved psychological well-being         | <b>Improvements in participants' mood</b><br>"I've been able to control my anger much better."                                                                                                                                        |
|                          |                                           | <b>Improved memory</b><br>"[Mindfulness] made me focus more and not on all my issues and problems, also helped me retain memory when reading."                                                                                        |
|                          |                                           | <b>Improved stress</b><br>"I used to be nervous and stressed much more [before the program]."<br>"[Mindfulness] helped to notice stress and get rid of bad thoughts."                                                                 |
|                          |                                           | <b>Brings you closer to your soul</b><br>"It's [mindfulness] opening communication between my mind and body."<br>"It [mindfulness] brings you closer to your soul, puts you in the right direction instead of down or lost."          |
|                          | Improved physiological well-being         | <b>Improved participants' blood pressure</b><br>"Morning meditation has helped me tremendously; as a matter of fact my blood pressure has gone down drastically."<br>"My blood pressure goes down because it [mindfulness] calms me." |
|                          |                                           | <b>Enjoyed interaction with an instructor</b><br>"It was fun getting to know the instructor, too bad it has to come to an end."                                                                                                       |
|                          |                                           | <b>Not enough time to do homework</b><br>"I am so busy and I didn't have time to do the meditation at home."                                                                                                                          |
|                          |                                           | <b>Home environment inhibited informal practice</b><br>"[Difficult to practice at home] because of my situation, family with 2 young kids, little sleep 3 – 4hrs; no space for quiet at home."                                        |
| 2. Practice and Homework | Didn't engage in homework                 | <b>Did not like some of the informal practices</b><br>"I didn't enjoy the tapping exercise as I found it hard to get in to."                                                                                                          |
|                          |                                           | <b>Too tired</b><br>"I like the [informal] mindfulness practices but I was often too tired to practice outside of sessions."                                                                                                          |
|                          |                                           | <b>STOP (Stop, Take a breath, Observe, Proceed) exercise was helpful</b>                                                                                                                                                              |
|                          | Informal mindfulness practices beneficial |                                                                                                                                                                                                                                       |

|               |                                       |                                                                                                                                                                                                                                                                                                                                                                                                                                                                                                                                             |
|---------------|---------------------------------------|---------------------------------------------------------------------------------------------------------------------------------------------------------------------------------------------------------------------------------------------------------------------------------------------------------------------------------------------------------------------------------------------------------------------------------------------------------------------------------------------------------------------------------------------|
|               |                                       | <p><i>"I think it's helpful. It makes you aware of your environment."</i></p> <p><i>"I really enjoyed practicing this technique as it was easy and yielded a good result."</i></p> <p><i>"I practice [STOP exercise] when waiting when others are late, such as the nurse or [dialysis] transport, and it helps."</i></p> <p><b>Body Scan helps to engage with what is going on in the body</b></p> <p><i>"Body scan makes you get in touch with the body and you see what is happening."</i></p>                                           |
| 3. Challenges | Dialysis environment not optimal      | <p><b>Interrupted during formal mindfulness practice</b></p> <p><i>"I was annoyed being interrupted in [mindfulness] session as not a closed room and had distractions."</i></p> <p><b>Dialysis is stressful enough</b></p> <p><i>"Situation [for conducting the program] wasn't right, somewhere else would have been better as dialysis is stressful enough."</i></p> <p><b>Disturbed during dialysis to practice mindfulness</b></p> <p><i>"I didn't like being woken up for [mindfulness] sessions."</i></p>                            |
|               | Not enough information on mindfulness | <p><b>Perceived mindfulness to be a religious practice</b></p> <p><i>"I would have appreciated more background information about mindfulness because it felt a bit religious."</i></p> <p><b>Unclear of the purpose of mindfulness</b></p> <p><i>"Some of it [mindfulness] was very helpful but other parts less so because I was unclear of the goal [of the program]."</i></p>                                                                                                                                                            |
|               | Increased symptoms                    | <p><b>Body scan caused physiological and psychological symptoms</b></p> <p><i>"I started to get itchy all over when doing the body scan."</i></p> <p><i>"I enjoyed the techniques taught by the instructor, except the body scan as it made me agitated."</i></p> <p><i>"I like the body scan but because I have constant pain it can amplify the pain."</i></p> <p><b>Formal practice cause hypotension during dialysis</b></p> <p><i>"[I experienced] lower blood pressure during sessions which in dialysis is not always good."</i></p> |
|               |                                       |                                                                                                                                                                                                                                                                                                                                                                                                                                                                                                                                             |

**Table S2.** Active Control Group (HEP) Thematic Analysis.

| Overarching Themes       | Interpretative Themes                         | Descriptive Themes and Quotes                                                                                                                                                                                                                                          |
|--------------------------|-----------------------------------------------|------------------------------------------------------------------------------------------------------------------------------------------------------------------------------------------------------------------------------------------------------------------------|
| 1. Therapeutic Benefits  | Improved psychological well-being             | <b>Improved Depression</b><br><i>"It [HEP] helped with depression, I try not to cry as much and have better mood."</i><br><i>"It [HEP] helped me to fight depression quite a bit and made me more aware."</i>                                                          |
|                          |                                               | <b>Improved Mood</b><br><i>"[HEP] helps take me out of my suffering when I am in a bad mood."</i><br><i>"I used to yell at people at home but now I try not to."</i>                                                                                                   |
|                          |                                               | <b>Improved Sleep</b><br><i>"[I have been] sleeping better since I started [HEP]."</i><br><i>"Used it [HEP] when I had a hard time sleeping."</i>                                                                                                                      |
|                          |                                               | <b>Broke Monotony</b><br><i>"Really enjoyed something [HEP] that broke up the monotony of being in dialysis."</i>                                                                                                                                                      |
|                          |                                               | <b>Increased physical activity</b><br><i>"I will keep pushing to exercise, and I am presently looking for a new hobby...dance class?"</i><br><i>"I feel better when exercising and I am taking longer walks now."</i>                                                  |
|                          |                                               | <b>Gained knowledge of how to increase physical health through nutrition and exercise</b><br><i>"Health improvement [benefits]...it [HEP] put everything down in front of me of what I should be doing."</i><br><i>"Food section was beneficial, I learned a lot."</i> |
|                          |                                               | <b>Face-to-face delivery enhanced program</b><br><i>"The program was well planned, well executed and the lady [instructor] took good care of me."</i><br><i>"She [instructor] makes it clear and reminds me what to do which makes things clearer."</i>                |
|                          |                                               | <b>Participants liked to have someone to talk to</b><br><i>"[HEP] was a good chance to talk, good opportunity to talk with someone else."</i>                                                                                                                          |
|                          |                                               | <b>Other priorities</b><br><i>"It's [HEP homework] not a priority in my life."</i>                                                                                                                                                                                     |
|                          |                                               | <b>Not enough time to do homework</b><br><i>"I was involved too much in hospital care so didn't have much time [for homework]."</i><br><i>"Lack of time, I am busier than I want to be."</i>                                                                           |
| 2. Practice and Homework | Didn't engage in homework                     |                                                                                                                                                                                                                                                                        |
|                          | Practice at home became part of everyday life | <b>Found ways to incorporate into daily activities</b><br><i>"I incorporated it into what I was already doing."</i>                                                                                                                                                    |
| 3. Challenges            | Not enough information                        | <b>Like to know more about stress management</b><br><i>"Prefer more emphasis on stress management."</i>                                                                                                                                                                |
|                          |                                               | <b>More information needed on self-care</b><br><i>"More information on self-care, mental health concerns and mood and how these affect physical health"</i>                                                                                                            |

---

|                                |                                                                                                                                                     |
|--------------------------------|-----------------------------------------------------------------------------------------------------------------------------------------------------|
| Barriers to physical exercises | <b>Felt embarrassed carrying out exercises</b><br><i>"Sometimes I felt embarrassed as I can't move as well<br/>with exercise...self-conscious."</i> |
|--------------------------------|-----------------------------------------------------------------------------------------------------------------------------------------------------|

---
